# Supplementary material for: Antihypertensive Drugs and the Risk of Cancer: A Nationwide Cohort Study
Source: PubMed Central journal article supplement (PMC7918966; doi:10.3390/jcm10040771), 2021-02-15
Supplement: jcm-10-00771-s001.pdf [file jcm-10-00771-s001.pdf]

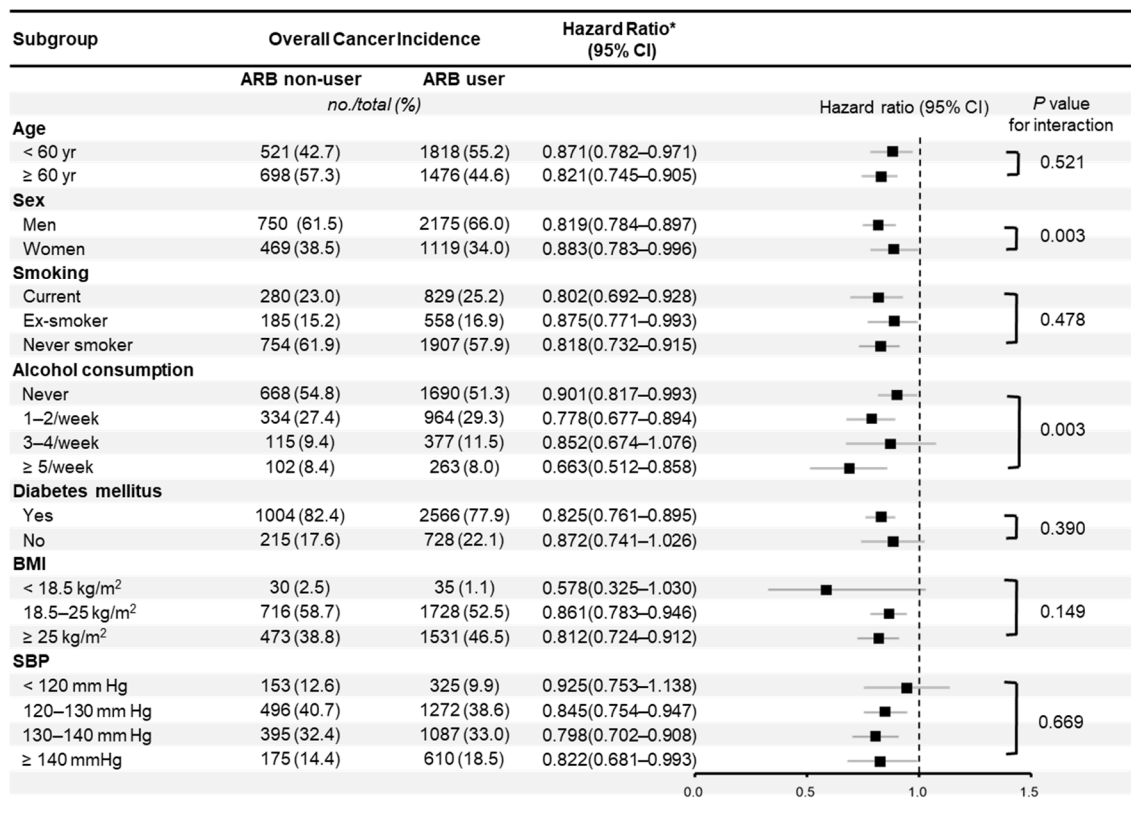

**Figure S1.** Subgroup analysis. \*Fully-adjusted for age; sex, BMI; SBP; the alcohol consumption frequency; the income status; comorbidities, including diabetes, heart failure, and chronic obstructive pulmonary disease; and each antihypertensive medication use. Square boxes indicate the hazard ratio and horizontal bars indicate 95% confidential intervals. BMI: body mass index; SBP: systolic blood pressure; ARB: angiotensin receptor blocker.

**Table S1.** International Classification of Disease (10th edition) Clinical Modification (ICD 10-CM) codes used to define the study population, outcomes, and comorbidities.

| Diseases                         | ICD-10 Codes | Diagnosis Definition                                     |
|----------------------------------|--------------|----------------------------------------------------------|
| Essential hypertension           | I10–I13      | Essential hypertension                                   |
|                                  |              | I10: essential (primary) hypertension                    |
|                                  |              | I11: hypertensive heart disease                          |
|                                  |              | I12: hypertensive chronic kidney disease                 |
|                                  |              | I13: hypertensive heart and chronic kidney disease       |
| Overall cancer                   | C00–C96      | Site-specific cancer                                     |
|                                  |              | C34: lung cancer                                         |
|                                  |              | C18–C20: colorectal cancer                               |
|                                  |              | C50: breast cancer                                       |
|                                  |              | C61: prostate cancer                                     |
|                                  |              | C67: bladder cancer                                      |
|                                  |              | C25: pancreatic cancer                                   |
|                                  |              | C64: kidney cancer                                       |
|                                  |              | C22: hepatic cancer                                      |
| C16: gastric cancer              |              |                                                          |
| Diabetes                         | E10–E13      | E10: type 1 diabetes mellitus                            |
|                                  |              | E11: type 2 diabetes mellitus                            |
|                                  |              | E12: malnutrition-related diabetes mellitus              |
|                                  |              | E13: other specified diabetes mellitus                   |
| Heart failure                    | I509         | I509: heart failure, unspecified                         |
| Chronic obstructive lung disease | J449         | J449: chronic obstructive pulmonary disease, unspecified |

**Table S2.** Comparison of baseline characteristics of individuals with and without an incident of cancer during the follow-up period.

| <b>Variable</b>               | <b>All Patients<br/>(N = 70,549)</b> | <b>Without Cancer<br/>(N = 66,036)</b> | <b>With Cancer<br/>(N = 4513)</b> | <b>p value</b> |
|-------------------------------|--------------------------------------|----------------------------------------|-----------------------------------|----------------|
| Follow-up, years              | 8.6 (6.7–10.8)                       | 8.8 (6.9–10.9)                         | 4.8 (2.6–7.3)                     | <0.0001        |
| Death, N (%)                  | 3025 (4.3)                           | 1796 (2.7)                             | 1229 (27.2)                       | <0.0001        |
| Age, years                    | 55.2 ± 9.2                           | 55.0 ± 9.1                             | 58.9 ± 9.0                        | 0.3819         |
| Male sex, N (%)               | 42,990 (60.9)                        | 40,065 (60.7)                          | 2925 (64.8)                       | <0.0001        |
| BMI, kg/m <sup>2</sup>        | 24.9 ± 3.0                           | 24.9 ± 3.0                             | 24.7 ± 3.0                        | 0.3575         |
| SBP, mmHg                     | 139.7 ± 18.3                         | 139.7 ± 18.3                           | 140.1 ± 19.0                      | 0.0001         |
| Smoking, N (%)                |                                      |                                        |                                   | 0.0235         |
| Current                       | 16,214 (23.0)                        | 15,105 (22.9)                          | 1109 (24.6)                       |                |
| Past smoker                   | 12,155 (17.2)                        | 11,412 (17.3)                          | 743 (16.5)                        |                |
| Never-smoker                  | 42,180 (59.8)                        | 39,519 (59.8)                          | 2661 (59.0)                       |                |
| Alcohol, N (%)                |                                      |                                        |                                   | <0.0001        |
| None                          | 35,575 (50.4)                        | 33,217 (50.3)                          | 2358 (52.3)                       |                |
| 1–2/week                      | 22,265 (31.6)                        | 20,967 (31.8)                          | 1298 (28.8)                       |                |
| 3–4/week                      | 8302 (11.8)                          | 7810 (11.8)                            | 492 (10.9)                        |                |
| ≥5/week                       | 4407 (6.3)                           | 4042 (6.1)                             | 365 (8.1)                         |                |
| Income, N (%)                 |                                      |                                        |                                   | 0.742          |
| Low (1–3 decile)              | 17,221 (24.4)                        | 16,113 (24.4)                          | 1108 (24.6)                       |                |
| Middle (4–7 decile)           | 23,982 (34.0)                        | 22,430 (34.0)                          | 1552 (34.4)                       |                |
| High (7–10 decile)            | 29,346 (41.6)                        | 27,493 (41.6)                          | 1853 (41.1)                       |                |
| Comorbidities                 |                                      |                                        |                                   |                |
| Diabetes, N (%)               | 13,382 (19.0)                        | 12,439 (18.8)                          | 943 (20.9)                        | 0.0006         |
| Heart failure, N (%)          | 216 (0.3)                            | 199 (0.3)                              | 17 (0.4)                          | 0.3755         |
| COPD, N (%)                   | 1704 (2.4)                           | 1539 (2.3)                             | 165 (3.7)                         | <0.0001        |
| Use of antihypertensive drugs |                                      |                                        |                                   |                |
| ACEI, N (%)                   | 4210 (6.0)                           | 3848 (5.8)                             | 362 (8.0)                         | <0.0001        |
| ARB, N (%)                    | 55,645 (78.9)                        | 52,351 (79.3)                          | 3294 (73.0)                       | <0.0001        |
| BB, N (%)                     | 13,158 (18.7)                        | 12,176 (18.4)                          | 982 (21.8)                        | <0.0001        |
| CCB, N (%)                    | 51,036 (72.3)                        | 47,593 (72.1)                          | 3443 (76.3)                       | <0.0001        |
| Diuretics, N (%)              | 32,990 (46.8)                        | 30,835 (46.7)                          | 2155 (47.8)                       | 0.1687         |

BMI, body mass index; SBP, systolic blood pressure; COPD, chronic obstructive pulmonary disease; ACEI, angiotensin converting enzyme inhibitor; ARB, angiotensin receptor blocker; BB, beta blocker; CCB, calcium channel blocker.
